# Supplementary material for: Taurine Enhances Iron-Related Proteins and Reduces Lipid Peroxidation in Differentiated C2C12 Myotubes
Source: PubMed Central journal article supplement (PMC7693586; doi:10.3390/antiox9111071), 2020-10-31
Supplement: antioxidants-09-01071-s001.pdf [file antioxidants-09-01071-s001.pdf]

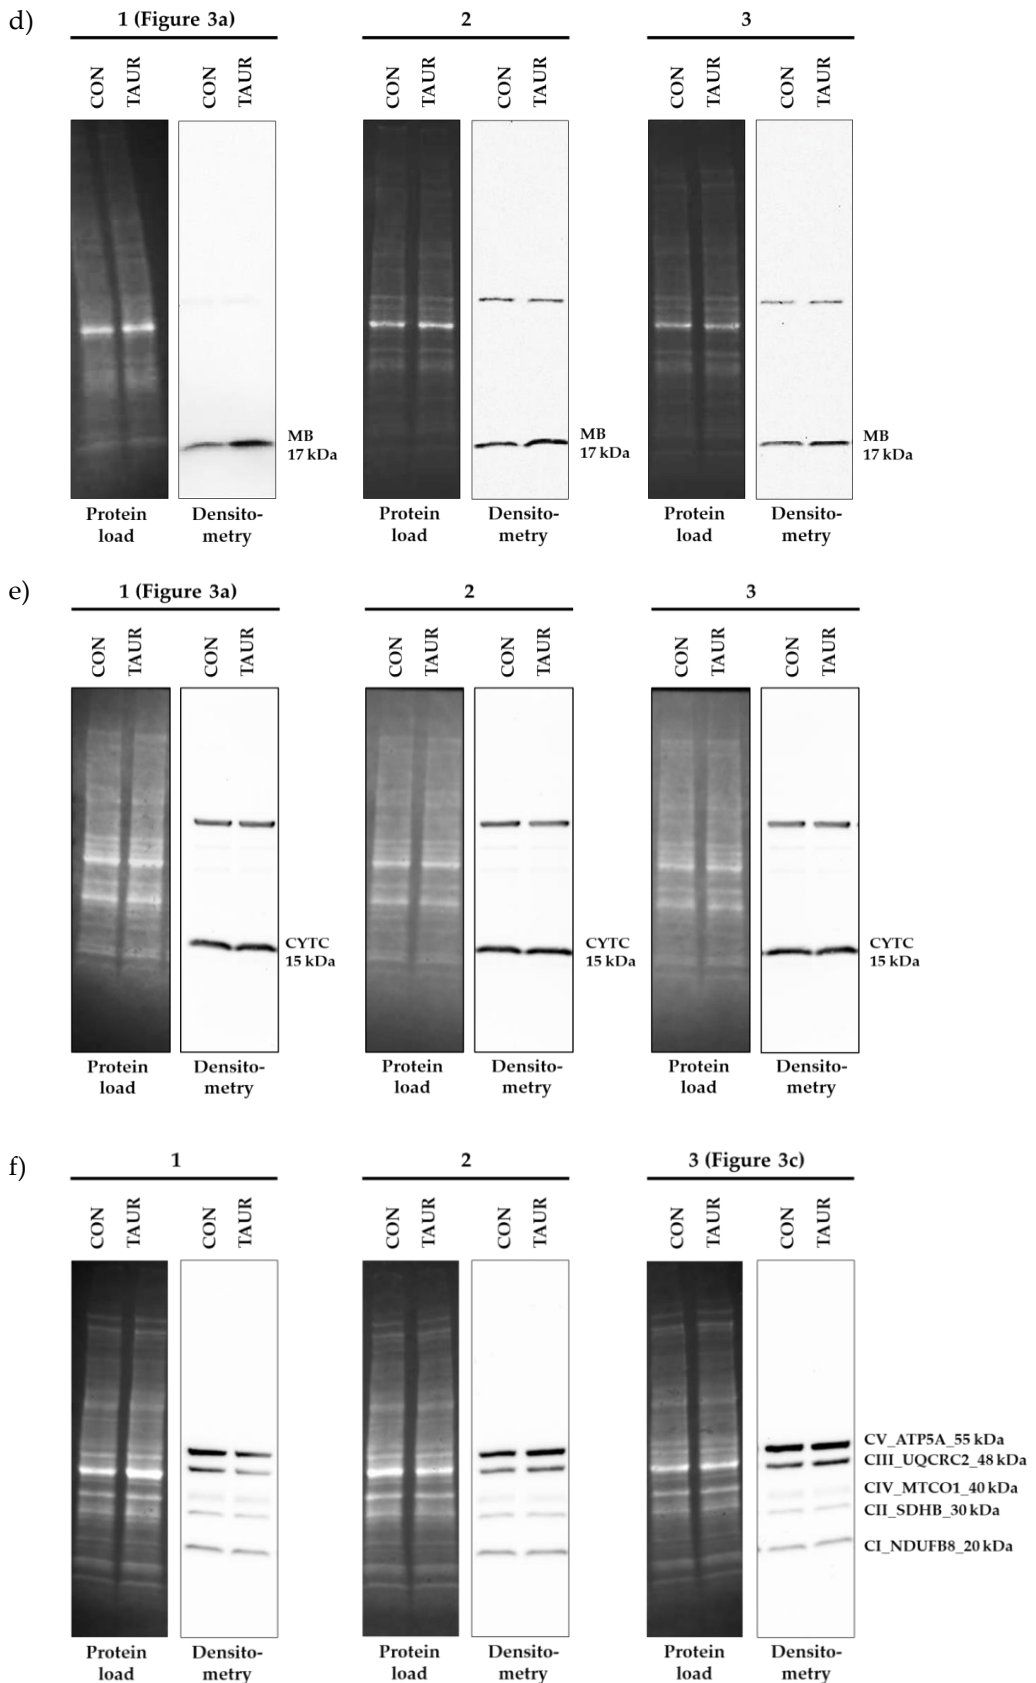

S1: Western blots of three independent experiments showing the protein load of the membrane and the respective target bands of the a) taurine transporter (TAUT) at 140 kDa, b) ferritin light chain (FTL) at 19 kDa, c) ferritin heavy chain (FTH) at 21 kDa, d) myoglobin (MB) at 17 kDa, e) Cytochrom C (CYTC) at 15 kDa and f) subunits of mitochondrial oxidative phosphorylation (OXPHOS) complexes CI (NADH dehydrogenase), CII (succinate dehydrogenase), CIII (ubiquinol-cytochrome c reductase), CIV (cytochrome c oxidase) and CV (ATP-Synthase) in response to control medium- (CON) and taurine- (TAUR) treatment
